# Supplementary material
Source: HighWire-hosted journal article supplement (https://erj.ersjournals.com/content/60/1/2200569)
Supplement: inline-supplementary-material-1 [file inline-supplementary-material-1.pdf]

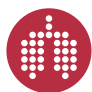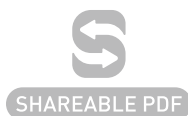

# Two phenotypes that predict prognosis in lung adenocarcinoma

Lukas Kalinke and Sam M. Janes 

UCL Respiratory, University College London, London, UK.

Corresponding author: Sam M. Janes ([s.janes@ucl.ac.uk](mailto:s.janes@ucl.ac.uk))

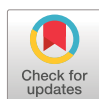

Shareable abstract (@ERSpublications)

**Histopathological biomarkers can predict survival in patients with resected lung adenocarcinoma**  
<https://bit.ly/3JN2HzL>

**Cite this article as:** Kalinke L, Janes SM. Two phenotypes that predict prognosis in lung adenocarcinoma. *Eur Respir J* 2022; 60: 2200569 [DOI: 10.1183/13993003.00569-2022].

This single-page version can be shared freely online.

Copyright ©The authors 2022.  
For reproduction rights and  
permissions contact  
[permissions@ersnet.org](mailto:permissions@ersnet.org)

Received: 16 March 2022  
Accepted: 21 March 2022

A lung cancer patient's prognosis is defined by a combination of the cancer stage, which defines the cancer location and spread; the patient's performance status, acting as an indirect measure of their ability to tolerate treatment; and finally, more intrinsic tumour-related properties such as the local immune contexture and tumour genetic makeup. The latter two dictate whether immunotherapy and targeted agents are treatment options.
